# Supplementary material for: Expression and evolutionary patterns of mycobacteriophage D29 and its temperate close relatives
Source: PubMed Central journal article supplement (PMC5712189; doi:10.1186/s12866-017-1131-2), 2017-12-02
Supplement: 12866_2017_1131_MOESM2_ESM.pdf [file 12866_2017_1131_MOESM2_ESM.pdf]

47,987

D29 | | | | |  
StarStuff | | | | |  
Pomar16 | | | | |  
Kerberos | | | | |  
Serenity | | | | |  
L5 | | | | |

D29 | | | | |  
StarStuff | | | | |  
Pomar16 | | | | |  
Kerberos | | | | |  
Serenity | | | | |  
L5 | | | | |

D29 | | | | |  
StarStuff | | | | |  
Pomar16 | | | | |  
Kerberos | | | | |  
Serenity | | | | |  
L5 | | | | |

D29 | | | | |  
StarStuff | | | | |  
Pomar16 | | | | |  
Kerberos | | | | |  
Serenity | | | | |  
L5 | | | | |

stoperator (L5 #5)

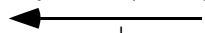

D29 | | | | |  
StarStuff | | | | |  
Pomar16 | | | | |  
Kerberos | | | | |  
Serenity | | | | |  
L5 | | | | |

stoperator (L5 #2)

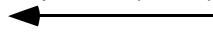

D29 | | | | |  
StarStuff | | | | |  
Pomar16 | | | | |  
Kerberos | | | | |  
Serenity | | | | |  
L5 | | | | |

L5 toxic expression

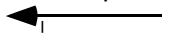

D29 and StarStuff toxic expression

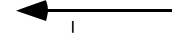

D29 | | | | |  
StarStuff | | | | |  
Pomar16 | | | | |  
Kerberos | | | | |  
Serenity | | | | |  
L5 | | | | |

Figure S1
